# Supplementary material for: Factors associated with potentially inappropriate prescriptions and barriers to medicines optimisation among older adults in primary care settings: a systematic review
Source: HighWire-hosted journal article supplement (doi:10.1136/fmch-2021-001325), 2021-11-01
Supplement: fmch-2021-001325supp001_data_supplement.pdf [file fmch-2021-001325supp001_data_supplement.pdf]

**Table S1** Search terms

| <b>PubMed (1559 records identified)</b>                                                                                                                                                                                                                                                                                                                                                                                                                                                                                                                                                                                                                                                                                                                                                                                                                                                                                                                                                                                                                                                                                                                                                                                                                                                                                                                                                                                                                                                                                                                                                                                                                                                                                                                                                                                                                                                                                                                                                                                                                                                                                                                                                                                                                                                                                                                                                                                                                                                                                                                                                                                                                                                                                                                                                                                                                                                                                                                                                                                                                                                                                                                                                                                                                                                                                                                                                                                                                                                                                                                                                                                                                                                                   |
|-----------------------------------------------------------------------------------------------------------------------------------------------------------------------------------------------------------------------------------------------------------------------------------------------------------------------------------------------------------------------------------------------------------------------------------------------------------------------------------------------------------------------------------------------------------------------------------------------------------------------------------------------------------------------------------------------------------------------------------------------------------------------------------------------------------------------------------------------------------------------------------------------------------------------------------------------------------------------------------------------------------------------------------------------------------------------------------------------------------------------------------------------------------------------------------------------------------------------------------------------------------------------------------------------------------------------------------------------------------------------------------------------------------------------------------------------------------------------------------------------------------------------------------------------------------------------------------------------------------------------------------------------------------------------------------------------------------------------------------------------------------------------------------------------------------------------------------------------------------------------------------------------------------------------------------------------------------------------------------------------------------------------------------------------------------------------------------------------------------------------------------------------------------------------------------------------------------------------------------------------------------------------------------------------------------------------------------------------------------------------------------------------------------------------------------------------------------------------------------------------------------------------------------------------------------------------------------------------------------------------------------------------------------------------------------------------------------------------------------------------------------------------------------------------------------------------------------------------------------------------------------------------------------------------------------------------------------------------------------------------------------------------------------------------------------------------------------------------------------------------------------------------------------------------------------------------------------------------------------------------------------------------------------------------------------------------------------------------------------------------------------------------------------------------------------------------------------------------------------------------------------------------------------------------------------------------------------------------------------------------------------------------------------------------------------------------------------|
| <p>(((((("primary health care"[MeSH Terms] OR "general practice*"[MeSH Terms]) OR "general practitioner*"[MeSH Terms]) OR "family practice*"[MeSH Terms]) OR "physicians, family"[MeSH Terms]) OR "community health centers"[MeSH Terms]) OR "community health services"[MeSH Terms]) OR "hospitals, community"[MeSH Terms]) OR ((((((("family"[Title/Abstract] AND "physician*"[Title/Abstract]) OR ("family"[Title/Abstract] AND "practice*"[Title/Abstract])) OR ("general"[Title/Abstract] AND "practitioner*"[Title/Abstract])) OR ("general"[Title/Abstract] AND "practice*"[Title/Abstract])) OR ("primary"[Title/Abstract] AND "care"[Title/Abstract])) OR ("community"[Title/Abstract] AND "health center*"[Title/Abstract])) OR ("community"[Title/Abstract] AND "health service*"[Title/Abstract])) OR ("community"[Title/Abstract] AND "hospital*"[Title/Abstract])) OR (((("clinics"[Title/Abstract] OR "township health center*"[Title/Abstract]) OR "rural health station*"[Title/Abstract]) OR "community health station*"[Title/Abstract]) OR "community pharmac*"[Title/Abstract])</p> <p>AND</p> <p>("elder*"[Title/Abstract] OR "old*"[Title/Abstract] OR "senior"[Title/Abstract] OR "ageing"[Title/Abstract] OR "geriatric"[Title/Abstract] OR "aged"[Title/Abstract]) OR ("aged"[MeSH Terms])</p> <p>AND</p> <p>("inappropriate prescribing"[MeSH Terms] OR "medication error*"[MeSH Terms]) OR ("Inappropriate Prescribing"[Title/Abstract] OR "Inappropriate Prescription*"[Title/Abstract] OR "Inappropriate medication*"[Title/Abstract] OR "Inappropriate drug*"[Title/Abstract] OR "Inappropriate medicine*"[Title/Abstract] OR "irrational prescribing*"[Title/Abstract] OR "irrational prescription*"[Title/Abstract] OR "high-risk prescription*"[Title/Abstract] OR "unsafe prescription*"[Title/Abstract] OR "high-risk medication*"[Title/Abstract] OR "unsafe medication*"[Title/Abstract] OR "harmful medication*"[Title/Abstract] OR "prescribing omission*"[Title/Abstract] OR "suboptimal prescribing"[Title/Abstract] OR "suboptimal medication*"[Title/Abstract] OR "overprescribing"[Title/Abstract] OR "over-prescribing"[Title/Abstract] OR "over-prescription"[Title/Abstract] OR "underprescribing"[Title/Abstract] OR "under-prescribing"[Title/Abstract] OR "under-prescription*"[Title/Abstract] OR "limited benefit medication*"[Title/Abstract] OR "medicines optimisation"[Title/Abstract] OR "medicines optimization"[Title/Abstract] OR "reconciliation"[Title/Abstract] OR "deprescrib*"[Title/Abstract] OR "medication review"[Title/Abstract] OR "medication withdrawal"[Title/Abstract] OR "drug withdrawal"[Title/Abstract] OR "medication cessation"[Title/Abstract] OR "drug cessation"[Title/Abstract] OR "discontinuing medication*"[Title/Abstract] OR "medication discontinuation"[Title/Abstract] )</p> <p>AND</p> <p>("factor*"[Title/Abstract] OR "influencing factor*"[Title/Abstract] OR "risk factor*"[Title/Abstract] OR "influence factor*"[Title/Abstract] OR "affecting factor*"[Title/Abstract] OR "barriers"[Title/Abstract] OR "association"[Title/Abstract] OR "obstacle*"[Title/Abstract] OR "associated factor*"[Title/Abstract] OR "factor*"[Title/Abstract] OR "predictor*"[Title/Abstract] OR "determinant*"[Title/Abstract] OR "facilitator*"[Title/Abstract] OR "enabler*"[Title/Abstract] OR "challenge*"[Title/Abstract] OR "difficult*"[Title/Abstract] OR "qualitative"[Title/Abstract] OR "recommendation*"[Title/Abstract] OR "solution*"[Title/Abstract] OR "interview*"[Title/Abstract] OR "thematic analysis"[Title/Abstract] OR "grounded theory"[Title/Abstract] OR "focus group*"[Title/Abstract])</p> |

| <b>Embase (3468 records identified)</b>                                                                                                                                                                                                                                                                                                                                                                                                                                                                                                                                                                                                                                                                                                                                                                                                                                                                                                                                                                                                                                                                                                        |
|------------------------------------------------------------------------------------------------------------------------------------------------------------------------------------------------------------------------------------------------------------------------------------------------------------------------------------------------------------------------------------------------------------------------------------------------------------------------------------------------------------------------------------------------------------------------------------------------------------------------------------------------------------------------------------------------------------------------------------------------------------------------------------------------------------------------------------------------------------------------------------------------------------------------------------------------------------------------------------------------------------------------------------------------------------------------------------------------------------------------------------------------|
| ('primary health care'/exp OR 'primary medical care'/exp OR 'general practitioner'/exp OR 'general practice*'/exp OR 'health center*'/exp OR 'community care'/exp OR 'community hospital*'/exp OR 'home care'/exp OR 'general practitioner*':ab,ti OR 'family physician*':ab,ti OR 'family doctor*':ab,ti OR 'general practice':ab,ti OR 'primary health care':ab,ti OR 'primary medical care':ab,ti OR 'community care':ab,ti OR 'home care':ab,ti OR 'township health center*':ab,ti OR 'rural health station*':ab,ti OR 'community health center*':ab,ti OR 'community health service*':ab,ti OR 'clinic*':ab,ti OR 'community health station*':ab,ti OR 'community pharmacist*'/exp OR ('pharmac*'/exp AND shop) OR 'community pharmac*':ab,ti OR 'pharmacy shop*':ab,ti)                                                                                                                                                                                                                                                                                                                                                                  |
| AND                                                                                                                                                                                                                                                                                                                                                                                                                                                                                                                                                                                                                                                                                                                                                                                                                                                                                                                                                                                                                                                                                                                                            |
| ('aged'/exp OR 'older adults'/exp OR 'older people'/exp OR 'older adult'/exp OR 'very elderly'/exp OR 'geriatric*'/exp OR senior:ab,ti OR aged:ab,ti OR old:ab,ti OR older:ab,ti OR elderly:ab,ti)                                                                                                                                                                                                                                                                                                                                                                                                                                                                                                                                                                                                                                                                                                                                                                                                                                                                                                                                             |
| AND                                                                                                                                                                                                                                                                                                                                                                                                                                                                                                                                                                                                                                                                                                                                                                                                                                                                                                                                                                                                                                                                                                                                            |
| ('inappropriate prescribing'/exp OR 'medication error*'/exp OR 'inappropriate drug use'/exp OR 'inappropriate drug*':ab,ti OR 'inappropriate medicine*':ab,ti OR 'inappropriate medication*':ab,ti OR 'inappropriate drug use':ab,ti OR 'irrational prescribing':ab,ti OR 'irrational prescription*':ab,ti OR 'high-risk prescription*':ab,ti OR 'high-risk medication*':ab,ti OR 'unsafe prescription':ab,ti OR 'unsafe medication*':ab,ti OR 'harmful medication*':ab,ti OR 'prescribing omission':ab,ti OR suboptimal prescribing:ab,ti OR suboptimal medication*':ab,ti OR overprescribing:ab,ti OR 'over prescribing':ab,ti OR 'over prescription':ab,ti OR underprescribing:ab,ti OR 'under prescribing':ab,ti OR 'under prescription*':ab,ti OR 'limited benefit medication*':ab,ti OR 'medicines minimisation':ab,ti OR 'medicines minimization':ab,ti OR 'reconciliation':ab,ti OR 'deprescrib*':ab,ti OR 'medication review':ab,ti OR 'medication withdrawal':ab,ti OR 'drug withdrawal':ab,ti OR 'medication cessation':ab,ti OR 'drug cessation':ab,ti OR 'discontinuing medication*':ab,ti OR 'medication discontinuation':ab,ti) |
| AND                                                                                                                                                                                                                                                                                                                                                                                                                                                                                                                                                                                                                                                                                                                                                                                                                                                                                                                                                                                                                                                                                                                                            |
| ('factor*':ab,ti OR 'influence factor*':ab,ti OR 'influencing factor*':ab,ti OR 'affecting factor*':ab,ti OR 'risk factor*':ab,ti OR 'associated factor*':ab,ti OR predictor*':ab,ti OR facilitator*':ab,ti OR enabler*':ab,ti OR barrier*':ab,ti OR obstacle*':ab,ti OR association:ab,ti OR determinant*':ab,ti OR 'focus group*':ab,ti OR 'grounded theory':ab,ti OR 'thematic analysis':ab,ti OR challenge*':ab,ti OR difficult*':ab,ti OR qualitative:ab,ti OR recommendation*':ab,ti OR solution*':ab,ti OR interview*':ab,ti)                                                                                                                                                                                                                                                                                                                                                                                                                                                                                                                                                                                                           |

**Scopus (5275 records identified)**

(TITLE-ABS-KEY ("primary health care" OR "primary medical care" OR "primary care" OR "family physician\*" OR "general practitioner\*" OR "family practice\*" OR "general practice\*" OR GP OR "community pharmac\*" OR clinic\* OR "community hospital\*" OR "community health center\*" OR "township health service\*" OR "home care" OR "pharmacy shop\*" OR "township health center\*" OR "rural health station\*" OR "community health station\*") AND SUBJAREA(MULT OR MEDI OR NURS OR VETE OR DENT OR HEAL OR PSYC OR SOCI)) AND (TITLE-ABS-KEY(elder\* OR old\* OR aged OR "elderly patient" OR "elderly adult\*" OR "older patient\*" OR "older adult\*" OR senior OR geriatric) AND SUBJAREA(MULT OR MEDI OR NURS OR VETE OR DENT OR HEAL OR PSYC OR SOCI)) AND (TITLE-ABS-KEY ("inappropriate prescribing" OR "medication error\*" OR "inappropriate prescription\*" OR "inappropriate medication\*" OR "inappropriate drug\*" OR "inappropriate medicine\*" OR "irrational prescribing" OR "irrational prescription\*" OR "high-risk prescription\*" OR "high-risk medication\*" OR "unsafe prescription\*" OR "unsafe medication\*" OR "harmful medication\*" OR "prescribing omission\*" OR "suboptimal prescribing" OR "suboptimal medication\*" OR "limited benefit medication\*" OR overprescribing OR over-prescribing OR over-prescription\* OR underprescribing OR under-prescribing OR under-prescription\* OR "medicines optimisation" OR "medicines optimization" OR deprescrib\* OR "medication review" OR "discontinuing medication\*" OR "medication discontinuation") AND SUBJAREA(MULT OR MEDI OR NURS OR VETE OR DENT OR HEAL OR PSYC OR SOCI)) AND (TITLE-ABS-KEY(factor\* OR barrier\* OR obstacle\* OR predictor\* OR facilitator\* OR enabler\* OR determinant\* OR "influence factor\*" OR "influencing factor\*" OR "risk factor\*" OR "affecting factor\*" OR association OR "associated factor\*" OR "focus group\*" OR "grounded theory" OR "thematic analysis" OR challenge\* OR difficult\* OR qualitative OR recommendation\* OR solution\* OR interview\*) AND SUBJAREA(MULT OR MEDI OR NURS OR VETE OR DENT OR HEAL OR PSYC OR SOCI))

**CINAHL (1075 records identified)**

TI ( "primary health care" OR "primary medical care" OR "primary care" OR "family physician\*" OR "general practitioner\*" OR "family practice\*" OR "general practice\*" OR GP OR "community pharmac\*" OR clinic\* OR "community hospital\*" OR "community health center\*" OR "home care" OR "township health center\*" OR "rural health station\*" OR "community health station\*" ) OR AB ( "primary health care" OR "primary medical care" OR "primary care" OR "family physician\*" OR "general practitioner\*" OR "family practice\*" OR "general practice\*" OR GP OR "community pharmac\*" OR clinic\* OR "community hospital\*" OR "community health center\*" OR "home care" OR "township health center\*" OR "rural health station\*" OR "community health station\*" )

AND

AG aged: 65+ years OR TI ( elder\* or aged or old\* or geriatric or senior ) OR AB ( elder\* or aged or old\* or geriatric or senior )

AND

TI ( "inappropriate prescribing" OR "medication error\*" OR "inappropriate prescription\*" OR "inappropriate medication\*" OR "inappropriate drug\*" OR "inappropriate medicine\*" OR "irrational prescribing" OR "irrational prescription\*" OR "high-risk prescription\*" OR "high-risk medication\*" OR "unsafe prescription\*" OR "unsafe medication\*" OR "harmful medication\*" OR "prescribing omission\*" OR "suboptimal prescribing" OR "limited benefit medication\*" OR "medicines optimisation" OR "medicines optimization" OR overprescribing OR over-prescribing OR over-prescription\* OR underprescribing OR under-prescribing OR under-prescription\* OR deprescrib\* OR reconciliation OR "medication review" OR "discontinuing medication\*" OR "medication discontinuation" OR "medication withdrawal" OR "drug withdrawal" OR "medication cessation" OR "drug cessation") OR AB ( "inappropriate prescribing" OR "medication error\*" OR "inappropriate prescription\*" OR "inappropriate medication\*" OR "inappropriate drug\*" OR "inappropriate medicine\*" OR "irrational prescribing" OR "irrational prescription\*" OR "high-risk prescription\*" OR "high-risk medication\*" OR "unsafe prescription\*" OR "unsafe medication\*" OR "harmful medication\*" OR "prescribing omission\*" OR "suboptimal prescribing" OR "limited benefit medication\*" OR "medicines optimisation" OR "medicines optimization" OR overprescribing OR over-prescribing OR over-prescription\* OR underprescribing OR under-prescribing OR under-prescription\* OR deprescrib\* OR reconciliation OR "medication review" OR "discontinuing medication\*" OR "medication discontinuation" OR "medication withdrawal" OR "drug withdrawal" OR "medication cessation" OR "drug cessation")

AND

TI ( ( factor\* OR barrier\* OR obstacle\* OR predictor\* OR facilitator\* OR enabler\* OR determinant\* OR "influence factor\*" OR "influencing factor\*" OR "risk factor\*" OR "affecting factor\*" OR association OR "associated factor\*" OR "focus group\*" OR "grounded theory" OR "thematic analysis" OR challenge\* OR difficult\* OR qualitative OR recommendation\* OR solution\* OR interview\* ) OR AB ( factor\* OR barrier\* OR obstacle\* OR predictor\* OR facilitator\* OR enabler\* OR determinant\* OR "influence factor\*" OR "influencing factor\*" OR "risk factor\*" OR "affecting factor\*" OR association OR "associated factor\*" OR "focus group\*" OR "grounded theory" OR "thematic analysis" OR challenge\* OR difficult\* OR qualitative OR recommendation\* OR solution\* OR interview\* )

**PsycInfo (256 records identified)**

TI ( "primary health care" OR "primary medical care" OR "primary care" OR "family physician\*" OR "general practitioner\*" OR "family practice\*" OR "general practice\*" OR GP\* OR "community pharmac\*" OR clinic\* OR "community hospital\*" OR "community health center\*" OR "home care" OR "township health center\*" OR "rural health station\*" OR "community health station\*" ) OR AB ( "primary health care" OR "primary medical care" OR "primary care" OR "family physician\*" OR "general practitioner\*" OR "family practice\*" OR "general practice\*" OR GP\* OR "community pharmac\*" OR clinic\* OR "community hospital\*" OR "community health center\*" OR "home care" OR "township health center\*" OR "rural health station\*" OR "community health station\*" )

AND

AG aged: 65+ years OR TI ( elder\* or aged or old\* or geriatric or senior ) OR AB ( elder\* or aged or old\* or geriatric or senior )

AND

TI ( "inappropriate prescribing" OR "medication error\*" OR "inappropriate prescription\*" OR "inappropriate medication\*" OR "inappropriate drug\*" OR "inappropriate medicine\*" OR "irrational prescribing" OR "irrational prescription\*" OR "high-risk prescription\*" OR "high-risk medication\*" OR "unsafe prescription\*" OR "unsafe medication\*" OR "harmful medication\*" OR "prescribing omission\*" OR "suboptimal prescribing" OR "limited benefit medication\*" OR "medicines optimisation" OR "medicines optimization" OR overprescribing OR over-prescribing OR over-prescription\* OR underprescribing OR under-prescribing OR under-prescription\* OR deprescrib\* OR reconciliation OR "medication review" OR "discontinuing medication\*" OR "medication discontinuation" OR "medication withdrawal" OR "drug withdrawal" OR "medication cessation" OR "drug cessation" ) OR AB ( "inappropriate prescribing" OR "medication error\*" OR "inappropriate prescription\*" OR "inappropriate medication\*" OR "inappropriate drug\*" OR "inappropriate medicine\*" OR "irrational prescribing" OR "irrational prescription\*" OR "high-risk prescription\*" OR "high-risk medication\*" OR "unsafe prescription\*" OR "unsafe medication\*" OR "harmful medication\*" OR "prescribing omission\*" OR "suboptimal prescribing" OR "limited benefit medication\*" OR "medicines optimisation" OR "medicines optimization" OR overprescribing OR over-prescribing OR over-prescription\* OR underprescribing OR under-prescribing OR under-prescription\* OR deprescrib\* OR reconciliation OR "medication review" OR "discontinuing medication\*" OR "medication discontinuation" OR "medication withdrawal" OR "drug withdrawal" OR "medication cessation" OR "drug cessation" )

AND

TI ( ( factor\* OR barrier\* OR obstacle\* OR predictor\* OR facilitator\* OR enabler\* OR determinant\* OR "influence factor\*" OR "influencing factor\*" OR "risk factor\*" OR "affecting factor\*" OR association OR "associated factor\*" OR "focus group\*" OR "grounded theory" OR "thematic analysis" OR challenge\* OR difficult\* OR qualitative OR recommendation\* OR solution\* OR interview\* ) OR AB ( factor\* OR barrier\* OR obstacle\* OR predictor\* OR facilitator\* OR enabler\* OR determinant\* OR "influence factor\*" OR "influencing factor\*" OR "risk factor\*" OR "affecting factor\*" OR association OR "associated factor\*" OR "focus group\*" OR "grounded theory" OR "thematic analysis" OR challenge\* OR difficult\* OR qualitative OR recommendation\* OR solution\* OR interview\* )

**WOS (567 records identified)**

(TI=(primary health care" OR "primary medical care" OR "primary care" OR "family physician\*" OR "general practitioner\*" OR "family practice\*" OR "general practice\*" OR GP OR "community pharmac\*" OR clinic\* OR "community hospital\*" OR "community health center\*" OR "home care" OR "township health center\*" OR "rural health station\*" OR "community health station\*" OR "community pharmac\*") OR AB=(primary health care" OR "primary medical care" OR "primary care" OR "family physician\*" OR "general practitioner\*" OR "family practice\*" OR "general practice\*" OR GP OR "community pharmac\*" OR clinic\* OR "community hospital\*" OR "community health center\*" OR "home care" OR "township health center\*" OR "rural health station\*" OR "community health station\*" OR "community pharmac\*"))

AND

(TI=(elder\* OR old\* OR aged OR senior OR geriatric\*) OR AB=(elder\* OR old\* OR aged OR senior OR geriatric\*))

AND

(TI=("inappropriate prescribing" OR "medication error\*" OR "inappropriate prescription\*" OR "inappropriate medication\*" OR "inappropriate drug\*" OR "inappropriate medicine\*" OR "irrational prescribing" OR "irrational prescription\*" OR "high-risk prescription\*" OR "high-risk medication\*" OR "unsafe prescription\*" OR "unsafe medication\*" OR "harmful medication\*" OR "prescribing omission\*" OR "suboptimal prescribing" OR "suboptimal medication\*" OR "limited benefit medication\*" OR "medicines optimisation" OR "medicines optimization" OR overprescribing OR over-prescribing OR over-prescription\* OR underprescribing OR under-prescribing OR under-prescription\* OR deprescrib\* OR reconciliation OR "medication review" OR "discontinuing medication\*" OR "medication discontinuation" OR "medication withdrawal" OR "drug withdrawal" OR "medication cessation" OR "drug cessation") OR AB=("inappropriate prescribing" OR "medication error\*" OR "inappropriate prescription\*" OR "inappropriate medication\*" OR "inappropriate drug\*" OR "inappropriate medicine\*" OR "irrational prescribing" OR "irrational prescription\*" OR "high-risk prescription\*" OR "high-risk medication\*" OR "unsafe prescription\*" OR "unsafe medication\*" OR "harmful medication\*" OR "prescribing omission\*" OR "suboptimal prescribing" OR "suboptimal medication\*" OR "limited benefit medication\*" OR "medicines optimisation" OR "medicines optimization" OR overprescribing OR over-prescribing OR over-prescription\* OR underprescribing OR under-prescribing OR under-prescription\* OR deprescrib\* OR reconciliation OR "medication review" OR "discontinuing medication\*" OR "medication discontinuation" OR "medication withdrawal" OR "drug withdrawal" OR "medication cessation" OR "drug cessation"))

AND

(TI=(factor\* OR barrier\* OR obstacle\* OR predictor\* OR facilitator\* OR enabler\* OR determinant\* OR "influence factor\*" OR "influencing factor\*" OR "risk factor\*" OR "affecting factor\*" OR association OR "associated factor\*" OR "focus group\*" OR "grounded theory" OR "thematic analysis" OR challenge\* OR difficult\* OR qualitative OR recommendation\* OR solution\* OR interview\* ) OR AB=(factor\* OR barrier\* OR obstacle\* OR predictor\* OR facilitator\* OR enabler\* OR determinant\* OR "influence factor\*" OR "influencing factor\*" OR "risk factor\*" OR "affecting factor\*" OR association OR "associated factor\*" OR "focus group\*" OR "grounded theory" OR "thematic analysis" OR challenge\* OR difficult\* OR qualitative OR recommendation\* OR solution\* OR interview\* ))

**CNKI (615 records identified)**

(TI=( '社区卫生服务中心'+ '社区健康服务中心'+ '社区卫生服务站'+ '社康中心'+ '社区医院'+ '社区门诊'+ '卫生院'+ '卫生室'+ '基层医疗机构'+ '基层医院'+ '基层医院'+ '家庭医生'+ '社区医生'+ '社区药师'+ '社区药房'+ '全科医生'+ '全科门诊'+ '老年社区'+ '诊所'+ '居家')) OR (AB=( '社区卫生服务中心'+ '社区健康服务中心'+ '社区卫生服务站'+ '社康中心'+ '社区医院'+ '社区门诊'+ '卫生院'+ '卫生室'+ '基层医疗机构'+ '基层医院'+ '基层医院'+ '家庭医生'+ '社区医生'+ '社区药师'+ '社区药房'+ '全科医生'+ '全科门诊'+ '老年社区'+ '诊所'+ '居家'))

在结果中检索

(TI=( '不合理用药'+ '不适当用药'+ '不合理处方'+ '不适当处方'+ '高危用药'+ '不规范处方'+ '不规范用药'+ '处方精简'+ '处方优化'+ '处方评估'+ '处方点评'+ '处方审查' + 'Beers' + 'STOPP' + 'START')) OR (AB=( '不合理用药'+ '不适当用药'+ '不合理处方'+ '不适当处方'+ '高危用药'+ '不规范处方'+ '不规范用药'+ '处方精简'+ '处方优化'+ '处方评估'+ '处方点评'+ '处方审查'+ 'Beers' + 'STOPP' + 'START' ))

在结果中检索

(TI=( '老年'+ '老龄'+ '高龄'+ '高人')) OR (AB=(( '老年'+ '老龄'+ '高龄'+ '老人')))

在结果中检索

(TI=( '因素'+ '分析'+ '预测'+ '情况'+ '现况'+ '现状'+ '质性研究'+ '定性研究'+ '访谈'+ '建议'+ '主题分析'+ '扎根理论'+ '困难'+ '挑战')) OR (AB=(( '因素'+ '分析'+ '预测'+ '情况'+ '现况'+ '现状'+ '质性研究'+ '定性研究'+ '访谈'+ '建议'+ '主题分析'+ '扎根理论'+ '困难'+ '挑战')))

**Wanfang (352 records identified)**

(摘要:( '社区卫生服务中心"or"社区健康服务中心"or"社区医院"or"社区卫生服务站"or"社康中心"or"社区门诊"or"卫生院"or"卫生室"or"基层医疗机构"or"基层医院"or"家庭医生"or"社区医生"or"社区药师"or"社区药房"or"全科医生"or"全科门诊"or"老年社区"or"诊所"or"居家") or (题名:( '社区卫生服务中心"or"社区健康服务中心"or"社区医院"or"社区卫生服务站"or"社康中心"or"社区门诊"or"卫生院"or"卫生室"or"基层医疗机构"or"基层医院"or"家庭医生"or"社区医生"or"社区药师"or"社区药房"or"全科医生"or"全科门诊"or"老年社区"or"诊所"or"居家"))

and

((摘要:( '老年"or"老龄"or"高龄"or"老人") or (题名:( '老年"or"老龄"or"高龄"or"老人"))

and

(摘要:( '不合理用药"or"不合理处方"or"不适当处方"or"不适当用药"or"高危用药"or"不规范处方"or"不规范用药"or"潜在风险处方"or"潜在有害药物"or"处方精简"or"处方优化"or"处方点评"or"处方审查"or"处方评估"or"Beers"or"STOPP"or"START")) or (题名:( '不合理用药"or"不合理处方"or"不适当处方"or"不适当用药"or"高危用药"or"不规范处方"or"不规范用药"or"潜在风险处方"or"潜在有害药物"or"处方精简"or"处方优化"or"处方点评"or"处方审查"or"处方评估"or"Beers"or"STOPP"or"START"))

and

(摘要:( '因素"or"分析"or"预测"or"情况"or"现况"or"现状"or"质性研究"or"定性研究"or"访谈"or"建议"or"主题分析"or"扎根理论"or"困难"or"挑战") or (题名:( '因素"or"分析"or"预测"or"情况"or"现况"or"现状"or"质性研究"or"定性研究"or"访谈"or"建议"or"主题分析"or"扎根理论"or"困难"or"挑战"))
