# Supplementary material for: Factors associated with potentially inappropriate prescriptions and barriers to medicines optimisation among older adults in primary care settings: a systematic review
Source: HighWire-hosted journal article supplement (doi:10.1136/fmch-2021-001325), 2021-11-01
Supplement: fmch-2021-001325supp002_data_supplement.pdf [file fmch-2021-001325supp002_data_supplement.pdf]

**Table S2** Summary of included quantitative studies

| First author (year)                   | JB1 score | Period studied             | Setting                                                                                                                     | Participant information                        | Sample size | Tool                                                               | Prevalence of PIPs |
|---------------------------------------|-----------|----------------------------|-----------------------------------------------------------------------------------------------------------------------------|------------------------------------------------|-------------|--------------------------------------------------------------------|--------------------|
| <b>Cross-sectional Studies</b>        |           |                            |                                                                                                                             |                                                |             |                                                                    |                    |
| Bradley (2012) <sup>25</sup>          | 7         | 2009-2010                  | Prescribing database, UK                                                                                                    | Older adults (≥70y)                            | 166,108     | STOPP/START (version 1)                                            | 32.2%              |
| Vatcharavongvan (2019) <sup>26</sup>  | 8         | 2016-2017                  | Primary care unit, Thailand                                                                                                 | Older adults (>65y)                            | 400         | Beers criteria (version 2015), STOPP (version 2), Winit-Watjana    | 75.3%              |
| Fialová (2005) <sup>27</sup>          | 7         | 2000-2003                  | AdHOC data set, Czech Republic, Denmark, Finland, Iceland, Italy, the Netherlands, Norway, France, Germany, Sweden, and UK. | Older adults (≥65y)                            | 2,707       | Beers criteria (version 1997&2003), Mcleod criteria (version 1997) | 19.8%              |
| Castillo-Páramo (2014) <sup>28</sup>  | 7         | 2011                       | Fifty-three health centers, Spain                                                                                           | Older adults (≥65y)                            | 108,322     | STOPP/START (version 1)                                            | 37.5-50.7%         |
| Nuñez-Montenegro (2019) <sup>29</sup> | 7         | NM                         | Primary care centers, Spain                                                                                                 | Older adults (>65y)                            | 425         | STOPP/START (version 1)                                            | 45.2%              |
| Wang (2019) <sup>30</sup>             | 6         | 2013-2015                  | Twenty-three community pharmacies, Taiwan                                                                                   | Older adults (≥65y)                            | 13,873      | Beers criteria (version 2015)                                      | 65.5%              |
| Ble (2015) <sup>31</sup>              | 7         | 2003-2011                  | Five hundred and four general practices, UK                                                                                 | Older adults (≥65y)                            | 13,900      | Beers criteria (version 2012)                                      | 36.9-38.7%         |
| Moriarty (2015) <sup>32</sup>         | 6         | 1999, 2002, 2007, and 2012 | Pharmacy claims data, Ireland                                                                                               | Older adults (≥65y)                            | 1,595,054   | STOPP criteria (version 1)                                         | 28.6-37.3%         |
| Lopez-Rodriguez (2020) <sup>33</sup>  | 7         | 2016-2017                  | 38 healthcare centres, Spain                                                                                                | Older adults (65-74y), primary care physicians | 593+38      | Beers criteria (version 2015&2019), STOPP criteria (version 1&2),  | 43.6-94.1%         |

|                                |   |           |                                            |                                               |               | MAI                                                                     |            |
|--------------------------------|---|-----------|--------------------------------------------|-----------------------------------------------|---------------|-------------------------------------------------------------------------|------------|
| Cahir (2014) <sup>34</sup>     | 6 | 2007      | Pharmacy claims database, Ireland          | Older adults (≥70y) and general practitioners | 338,725+1,938 | STOPP criteria (version 1)                                              | 35.8%      |
| Bradley (2014) <sup>35</sup>   | 6 | 2007      | Clinical Practice Research Datalink, UK    | Older adults (≥70y)                           | 1,019,491     | STOPP criteria (version 1)                                              | 29.0%      |
| Lund (2012) <sup>36</sup>      | 6 | 2007      | Veterans Affairs database, USA             | Older adults (≥65y)                           | 1,549,824     | Zhan criteria (version 2001), Fick criteria (version 2003)              | 16.5-17.9% |
| Buck (2009) <sup>37</sup>      | 7 | 2006      | Two outpatient primary care settings, USA  | Older adults (≥65y)                           | 61,251        | Beers criteria (version 2002), Zhan criteria (version 2001)             | 16.6-23.2% |
| Cahir (2010) <sup>38</sup>     | 6 | 2007      | Pharmacy claims database, Ireland          | Older adults (≥70y)                           | 338,801       | STOPP criteria (version 1)                                              | 35.8%      |
| Kovačević (2014) <sup>39</sup> | 4 | 2012      | Five community pharmacies, Serbia          | Older adults (≥65y)                           | 509           | STOPP/START (version 1)                                                 | 27.3%      |
| Lin (2011) <sup>40</sup>       | 5 | 2008      | One community health center, Taiwan        | Older adults (≥65y)                           | 327           | Beers criteria (version 2003)                                           | 27.5%      |
| Simões (2019) <sup>41</sup>    | 6 | 2018      | Electronic prescription platform, Portugal | Older adults (≥65y)                           | 757           | Beers criteria (version 2015)                                           | 68.6%      |
| Howard (2004) <sup>42</sup>    | 5 | NM        | Forty-eight family practices, Canada       | Older adults (≥65y)                           | 777           | Beers criteria (version 1997)                                           | 16.3%      |
| Zeenny (2017) <sup>43</sup>    | 5 | 2012      | Community pharmacies, Lebanon              | Older adults (≥65y)                           | 248           | Beers criteria (version 2012)                                           | 45.2%      |
| Awad (2019) <sup>44</sup>      | 5 | 2016      | Ten primary healthcare centers, Kuwait     | Older adults (≥65y)                           | 420           | Beers criteria (version 2015), STOPP/START (version 2), 2014 FORTA list | 44.3-55.7% |
| Gorup (2017) <sup>45</sup>     | 5 | 2014-2015 | Thirty general practices, Slovenia         | Older adults (>65y)                           | 503           | STOPP/START (version 1)                                                 | 42.9%      |
| Mand (2014) <sup>46</sup>      | 6 | 2000-2007 | One hundred                                | Older adults (≥65y)                           | 24,619        | Beers criteria                                                          | 10.4%      |

|                                    |   |           |                                                    |                                                 |             |                                                           |            |
|------------------------------------|---|-----------|----------------------------------------------------|-------------------------------------------------|-------------|-----------------------------------------------------------|------------|
|                                    |   |           | and forty-eight family practices, Germany          |                                                 |             |                                                           |            |
| Tommelein (2016) <sup>47</sup>     | 5 | 2013-2014 | Two hundred and four community pharmacies, Belgium | Older adults (≥70y)                             | 1,016       | GheOP <sup>3</sup> S tool                                 | 97.1%      |
| Sakr (2018) <sup>48</sup>          | 4 | 2016-2017 | Twenty community pharmacies, Lebanon               | Older adults (≥65y)                             | 350         | Beers criteria (version 2015), STOPP/START                | 29.4-60.0% |
| Hamano (2014) <sup>49</sup>        | 5 | 2013      | One clinic, Japan                                  | Older adults (≥65y)                             | 89          | STOPP/START (version 1)                                   | 40.4%      |
| Zhang (2020) <sup>50</sup>         | 5 | 2018      | Six community health centers, China                | Older adults (≥65y)                             | 968         | Beers criteria (version 2015)                             | 32.7%      |
| Liu (2020) <sup>51</sup>           | 5 | NM        | One community health center, China                 | Older adults (≥65y)                             | 360         | Beers criteria (version 2015), STOPP/START (version 2)    | 22.2%      |
| Rogero-Blanco (2020) <sup>52</sup> | 5 | 2016-2017 | Thirty-eight health care centers, Spain            | Older adults (65-75y)                           | 593         | Beers criteria (version 2015), STOPP/START (version 2014) | 72.8%      |
| Bala (2019) <sup>53</sup>          | 5 | 2015      | Database, New Zealand                              | Older adults (≥65y)                             | 16,568      | Beers criteria (version 2015)                             | 41.3-57.7% |
| Alhmoud (2015) <sup>54</sup>       | 6 | 2013      | Home Health Care Services, Qatar                   | Older adults (≥65y)                             | 501         | Beers criteria (version 2012)                             | 38.2 %     |
| Sayin (2020) <sup>55</sup>         | 4 | 2018-2019 | Two community pharmacies, Turkey                   | Older adults (≥65y)                             | 158         | GheOP <sup>3</sup> S tool                                 | 83.5%      |
| Imai (2007) <sup>56</sup>          | 6 | 1997-1998 | Data warehouse, USA                                | Older adults (>65y) and primary care physicians | 2,035+166   | Beers criteria (version 1997)                             | 26.1%      |
| Brekke (2008) <sup>57</sup>        | 4 | NM        | Prescription database, Norway                      | Older adults (≥70y) and general practitioners   | 85, 836+454 | Norwegian General Practice (NORGE) criteria               | 18.4%      |
| Ile (2017) <sup>58</sup>           | 5 | 2015-2016 | Family medicine practices, USA                     | Older adults (≥65y) and family physicians       | 932+61      | Beers criteria (version 2015), STOPP criteria (version 2) | 35.5%      |

| Longitudinal Studies      |   |           |                                           |                                               |           |                              |            |
|---------------------------|---|-----------|-------------------------------------------|-----------------------------------------------|-----------|------------------------------|------------|
| Amos (2015) <sup>59</sup> | 5 | 2012      | Administrative healthcare database, Italy | Older adults (≥65y) and general practitioners | 868,277   | Maio criteria (version 2011) | 27.8%      |
| Pugh (2011) <sup>60</sup> | 7 | 2002-2006 | Veterans Affairs outpatient clinics, USA  | Older adults (≥65y)                           | 1,567,467 | HEDIS HRME                   | 12.3-13.1% |

**Abbreviation**

NM: Not mentioned
