# Supplementary material for: Factors associated with potentially inappropriate prescriptions and barriers to medicines optimisation among older adults in primary care settings: a systematic review
Source: HighWire-hosted journal article supplement (doi:10.1136/fmch-2021-001325), 2021-11-01
Supplement: fmch-2021-001325supp002_data_supplement.pdf [file fmch-2021-001325supp002_data_supplement.pdf]

**Table S2** Summary of included quantitative studies

| First author (year)                   | JBİ score | Period studied             | Setting                                                                                                                     | Participant information                        | Sample size | Tool                                                               | Prevalence of PIPs |
|---------------------------------------|-----------|----------------------------|-----------------------------------------------------------------------------------------------------------------------------|------------------------------------------------|-------------|--------------------------------------------------------------------|--------------------|
| <b>Cross-sectional Studies</b>        |           |                            |                                                                                                                             |                                                |             |                                                                    |                    |
| Bradley (2012) <sup>25</sup>          | 7         | 2009-2010                  | Prescribing database, UK                                                                                                    | Older adults (≥70y)                            | 166,108     | STOPP/START (version 1)                                            | 32.2%              |
| Vatcharavongvan (2019) <sup>26</sup>  | 8         | 2016-2017                  | Primary care unit, Thailand                                                                                                 | Older adults (>65y)                            | 400         | Beers criteria (version 2015), STOPP (version 2), Winit-Watjana    | 75.3%              |
| Fialová (2005) <sup>27</sup>          | 7         | 2000-2003                  | AdHOC data set, Czech Republic, Denmark, Finland, Iceland, Italy, the Netherlands, Norway, France, Germany, Sweden, and UK. | Older adults (≥65y)                            | 2,707       | Beers criteria (version 1997&2003), Mcleod criteria (version 1997) | 19.8%              |
| Castillo-Páramo (2014) <sup>28</sup>  | 7         | 2011                       | Fifty-three health centers, Spain                                                                                           | Older adults (≥65y)                            | 108,322     | STOPP/START (version 1)                                            | 37.5-50.7%         |
| Núñez-Montenegro (2019) <sup>29</sup> | 7         | NM                         | Primary care centers, Spain                                                                                                 | Older adults (>65y)                            | 425         | STOPP/START (version 1)                                            | 45.2%              |
| Wang (2019) <sup>30</sup>             | 6         | 2013-2015                  | Twenty-three community pharmacies, Taiwan                                                                                   | Older adults (≥65y)                            | 13,873      | Beers criteria (version 2015)                                      | 65.5%              |
| Ble (2015) <sup>31</sup>              | 7         | 2003-2011                  | Five hundred and four general practices, UK                                                                                 | Older adults (≥65y)                            | 13,900      | Beers criteria (version 2012)                                      | 36.9-38.7%         |
| Moriarty (2015) <sup>32</sup>         | 6         | 1999, 2002, 2007, and 2012 | Pharmacy claims data, Ireland                                                                                               | Older adults (≥65y)                            | 1,595,054   | STOPP criteria (version 1)                                         | 28.6-37.3%         |
| Lopez-Rodriguez (2020) <sup>33</sup>  | 7         | 2016-2017                  | 38 healthcare centres, Spain                                                                                                | Older adults (65-74y), primary care physicians | 593+38      | Beers criteria (version 2015&2019), STOPP criteria (version 1&2),  | 43.6-94.1%         |

|                                |   |           |                                            |                                               |               | MAI                                                                     |            |
|--------------------------------|---|-----------|--------------------------------------------|-----------------------------------------------|---------------|-------------------------------------------------------------------------|------------|
| Cahir (2014) <sup>34</sup>     | 6 | 2007      | Pharmacy claims database, Ireland          | Older adults (≥70y) and general practitioners | 338,725+1,938 | STOPP criteria (version 1)                                              | 35.8%      |
| Bradley (2014) <sup>35</sup>   | 6 | 2007      | Clinical Practice Research Datalink, UK    | Older adults (≥70y)                           | 1,019,491     | STOPP criteria (version 1)                                              | 29.0%      |
| Lund (2012) <sup>36</sup>      | 6 | 2007      | Veterans Affairs database, USA             | Older adults (≥65y)                           | 1,549,824     | Zhan criteria (version 2001), Fick criteria (version 2003)              | 16.5-17.9% |
| Buck (2009) <sup>37</sup>      | 7 | 2006      | Two outpatient primary care settings, USA  | Older adults (≥65y)                           | 61,251        | Beers criteria (version 2002), Zhan criteria (version 2001)             | 16.6-23.2% |
| Cahir (2010) <sup>38</sup>     | 6 | 2007      | Pharmacy claims database, Ireland          | Older adults (≥70y)                           | 338,801       | STOPP criteria (version 1)                                              | 35.8%      |
| Kovačević (2014) <sup>39</sup> | 4 | 2012      | Five community pharmacies, Serbia          | Older adults (≥65y)                           | 509           | STOPP/START (version 1)                                                 | 27.3%      |
| Lin (2011) <sup>40</sup>       | 5 | 2008      | One community health center, Taiwan        | Older adults (≥65y)                           | 327           | Beers criteria (version 2003)                                           | 27.5%      |
| Simões (2019) <sup>41</sup>    | 6 | 2018      | Electronic prescription platform, Portugal | Older adults (≥65y)                           | 757           | Beers criteria (version 2015)                                           | 68.6%      |
| Howard (2004) <sup>42</sup>    | 5 | NM        | Forty-eight family practices, Canada       | Older adults (≥65y)                           | 777           | Beers criteria (version 1997)                                           | 16.3%      |
| Zeenny (2017) <sup>43</sup>    | 5 | 2012      | Community pharmacies, Lebanon              | Older adults (≥65y)                           | 248           | Beers criteria (version 2012)                                           | 45.2%      |
| Awad (2019) <sup>44</sup>      | 5 | 2016      | Ten primary healthcare centers, Kuwait     | Older adults (≥65y)                           | 420           | Beers criteria (version 2015), STOPP/START (version 2), 2014 FORTA list | 44.3-55.7% |
| Gorup (2017) <sup>45</sup>     | 5 | 2014-2015 | Thirty general practices, Slovenia         | Older adults (>65y)                           | 503           | STOPP/START (version 1)                                                 | 42.9%      |
| Mand (2014) <sup>46</sup>      | 6 | 2000-2007 | One hundred                                | Older adults (≥65y)                           | 24,619        | Beers criteria                                                          | 10.4%      |

|                                           |   |           |                                                                   |                                                          |             |                                                                    |            |
|-------------------------------------------|---|-----------|-------------------------------------------------------------------|----------------------------------------------------------|-------------|--------------------------------------------------------------------|------------|
|                                           |   |           | and<br>forty-eight<br>family<br>practices,<br>Germany             |                                                          |             |                                                                    |            |
| Tommelein<br>(2016) <sup>47</sup>         | 5 | 2013-2014 | Two<br>hundred<br>and four<br>community<br>pharmacies,<br>Belgium | Older adults<br>(≥70y)                                   | 1,016       | GheOP <sup>3</sup> S tool                                          | 97.1%      |
| Sakr<br>(2018) <sup>48</sup>              | 4 | 2016-2017 | Twenty<br>community<br>pharmacies,<br>Lebanon                     | Older adults<br>(≥65y)                                   | 350         | Beers criteria<br>(version 2015),<br>STOPP/START                   | 29.4-60.0% |
| Hamano<br>(2014) <sup>49</sup>            | 5 | 2013      | One clinic,<br>Japan                                              | Older adults<br>(≥65y)                                   | 89          | STOPP/START<br>(version 1)                                         | 40.4%      |
| Zhang<br>(2020) <sup>50</sup>             | 5 | 2018      | Six<br>community<br>health<br>centers,<br>China                   | Older adults<br>(≥65y)                                   | 968         | Beers criteria<br>(version 2015)                                   | 32.7%      |
| Liu<br>(2020) <sup>51</sup>               | 5 | NM        | One<br>community<br>health<br>center,<br>China                    | Older adults<br>(≥65y)                                   | 360         | Beers criteria<br>(version 2015),<br>STOPP/START<br>(version 2)    | 22.2%      |
| Rogero-Blan<br>co<br>(2020) <sup>52</sup> | 5 | 2016-2017 | Thirty-eight<br>health care<br>centers,<br>Spain                  | Older adults<br>(65-75y)                                 | 593         | Beers criteria<br>(version 2015),<br>STOPP/START<br>(version 2014) | 72.8%      |
| Bala<br>(2019) <sup>53</sup>              | 5 | 2015      | Database,<br>New<br>Zealand                                       | Older adults<br>(≥65y)                                   | 16,568      | Beers criteria<br>(version 2015)                                   | 41.3-57.7% |
| Alhmoud<br>(2015) <sup>54</sup>           | 6 | 2013      | Home<br>Health Care<br>Services,<br>Qatar                         | Older adults<br>(≥65y)                                   | 501         | Beers criteria<br>(version 2012)                                   | 38.2 %     |
| Sayin<br>(2020) <sup>55</sup>             | 4 | 2018-2019 | Two<br>community<br>pharmacies,<br>Turkey                         | Older adults<br>(≥65y)                                   | 158         | GheOP <sup>3</sup> S tool                                          | 83.5%      |
| Imai<br>(2007) <sup>56</sup>              | 6 | 1997-1998 | Data<br>warehouse,<br>USA                                         | Older adults<br>(>65y) and<br>primary care<br>physicians | 2,035+166   | Beers criteria<br>(version 1997)                                   | 26.1%      |
| Brekke<br>(2008) <sup>57</sup>            | 4 | NM        | Prescription<br>database,<br>Norway                               | Older adults<br>(≥70y) and<br>general<br>practitioners   | 85, 836+454 | Norwegian<br>General Practice<br>(NORGE)<br>criteria               | 18.4%      |
| le<br>(2017) <sup>58</sup>                | 5 | 2015-2016 | Family<br>medicine<br>practices,<br>USA                           | Older adults<br>(≥65y) and<br>family<br>physicians       | 932+61      | Beers criteria<br>(version 2015),<br>STOPP criteria<br>(version 2) | 35.5%      |

| Longitudinal Studies      |   |           |                                           |                                               |           |                              |            |
|---------------------------|---|-----------|-------------------------------------------|-----------------------------------------------|-----------|------------------------------|------------|
| Amos (2015) <sup>59</sup> | 5 | 2012      | Administrative healthcare database, Italy | Older adults (≥65y) and general practitioners | 868,277   | Maio criteria (version 2011) | 27.8%      |
| Pugh (2011) <sup>60</sup> | 7 | 2002-2006 | Veterans Affairs outpatient clinics, USA  | Older adults (≥65y)                           | 1,567,467 | HEDIS HRME                   | 12.3-13.1% |

**Abbreviation**

NM: Not mentioned
