# Supplementary material for: Factors associated with potentially inappropriate prescriptions and barriers to medicines optimisation among older adults in primary care settings: a systematic review
Source: HighWire-hosted journal article supplement (doi:10.1136/fmch-2021-001325), 2021-11-01
Supplement: fmch-2021-001325supp003_data_supplement.pdf [file fmch-2021-001325supp003_data_supplement.pdf]

**Table S3** Summary of included qualitative studies

| First author (year)            | JBI score | Period studied | Setting                                 | Participant information                                                                              | N                             | Approach                                                         | General results                                                                                                                                                                                                                                                                                                                                                                                             |
|--------------------------------|-----------|----------------|-----------------------------------------|------------------------------------------------------------------------------------------------------|-------------------------------|------------------------------------------------------------------|-------------------------------------------------------------------------------------------------------------------------------------------------------------------------------------------------------------------------------------------------------------------------------------------------------------------------------------------------------------------------------------------------------------|
| <b>Qualitative Studies</b>     |           |                |                                         |                                                                                                      |                               |                                                                  |                                                                                                                                                                                                                                                                                                                                                                                                             |
| Rieckert (2018) <sup>61</sup>  | 9         | 2015-2016      | GP practices, Germany                   | General practitioners                                                                                | 21                            | Semi-structured interviews                                       | Barriers to deprescribing medications included the GP and/or the patient prioritised differently, the GP regarded the medication as necessary, the GP feared that changing medication could get complex, recommendation not applicable to the patient, and GP's unwillingness of interfering with medication prescribed by a colleague.                                                                     |
| Clyne (2016) <sup>62</sup>     | 8         | 2013           | GP practices, Ireland                   | General practitioners                                                                                | 17                            | Semi-structured interviews                                       | Several inter-related factors that contribute to the occurrence of PIP including a complex prescribing environment, paternalistic doctor-patient relationships and limited relevance of the PIP concept for GPs.                                                                                                                                                                                            |
| Heser (2018) <sup>63</sup>     | 8         | 2014-2015      | Germany                                 | Elderly patients, General practitioners, and significant others of the patients                      | 52+<br>52+<br>48              | Semi-structured interviews                                       | Barriers to deprescribing include that PIM is not rated as problematic medication; patient does not care about side effects of PIM; alternative treatments are not utilized; resistance against cessation of PIM; Dependency or failed discontinuation of the medicine; ageism by the patient.                                                                                                              |
| Straßner (2017) <sup>64</sup>  | 8         | 2012-2014      | Germany                                 | General practitioners, specialists, pharmacists, nurses, medical assistants, and other professionals | 24+<br>4+1<br>+3+<br>6+1<br>7 | Thirty-eight semi-structured interviews and 2 focus groups       | A much wider range of domains need to be addressed, such as communication skills, patient involvement and practice organization.                                                                                                                                                                                                                                                                            |
| Pohontsch (2017) <sup>65</sup> | 8         | 2014-2015      | Germany                                 | General practitioners                                                                                | 47                            | Semi-structured interviews                                       | Prescription-, medication-, general practitioner-, patient- and system-related aspects related to the long-term use of PIM.                                                                                                                                                                                                                                                                                 |
| Heyworth (2013) <sup>66</sup>  | 8         | 2012           | Veterans Affairs clinic facilities, USA | Primary care physicians, nurse practitioners or physician assistants                                 | 13+<br>2                      | Semi-structured interviews                                       | Providers highlighted a number of patient-level obstacles hindering high-quality medication reconciliation, emphasizing the difficulty in achieving accurate medication reconciliation among complex or elderly patients. Providers identified limited time and support for medication reconciliation as key barriers.                                                                                      |
| Anderson (2017) <sup>67</sup>  | 7         | 2014           | Australia                               | General practitioners and consultant pharmacists                                                     | 32+<br>15                     | Five GP focus group interviews and two CP focus group interviews | Poorly developed interprofessional relationships and a lack of dedicated time and tacit knowledge/familiarity with patients for GPs and CPs, respectively, are important barriers to deprescribing for community-based older adults with polypharmacy. Well developed interprofessional relationships and less-siloed care will be critical to minimizing problematic polypharmacy and ultimately improving |

|                                |   |           |                               |                                                                   |                 |                              |                                                                                                                                                                                                                                                                                                                     |
|--------------------------------|---|-----------|-------------------------------|-------------------------------------------------------------------|-----------------|------------------------------|---------------------------------------------------------------------------------------------------------------------------------------------------------------------------------------------------------------------------------------------------------------------------------------------------------------------|
|                                |   |           |                               |                                                                   |                 |                              | patient outcomes                                                                                                                                                                                                                                                                                                    |
| Schuling (2012) <sup>68</sup>  | 7 | 2010-2011 | The Netherlands               | General practitioners                                             | 27              | Three focus group interviews | A range of factors affecting the GPs' deprescribing for elderly patients with multimorbidity, including a lack of information on the benefit/risk ratio for preventive medication, poor communication to the patients, and difficulties in identifying ADEs, cooperation with prescribing medical specialists, etc. |
| Hansen (2018) <sup>69</sup>    | 7 | 2017      | Community pharmacies, Ireland | Community pharmacists                                             | 18              | Semi-structured interviews   | Community pharmacists described challenges of overcoming social and environmental barriers, compounded by a lack of relevant guidelines for reducing PIP and education on the subject of PIP.                                                                                                                       |
| Wallis (2017) <sup>70</sup>    | 7 | NM        | New Zealand                   | Primary care physicians                                           | 24              | Semi-structured interviews   | Physicians described deprescribing as "swimming against the tide" of patient expectation, the medical culture of prescribing, and organizational constraints.                                                                                                                                                       |
| Weir (2019) <sup>71</sup>      | 7 | NM        | Australia                     | Pharmacists, older adults, and companions                         | 11+<br>17+<br>4 | Semi-structured interviews   | Barriers to effective home medication reviews include gaps in inter-professional communication and factors related to patient involvement.                                                                                                                                                                          |
| Magin (2015) <sup>72</sup>     | 7 | 2009-2010 | Australia                     | General practitioners                                             | 22              | Semi-structured interviews   | The concept of 'appropriate' versus 'inappropriate' medications implicit in classification systems is at odds with complex considerations informing decision-making prescribing PIMs in older persons.                                                                                                              |
| AlRasheed (2018) <sup>73</sup> | 7 | 2016      | Saudi Arabia                  | Family medicine specialists, residents, and general practitioners | 15              | Three focus group interviews | Barriers included lack of knowing the deprescribing term and process, patient comorbidities, risk/fear of conflict between physicians and clinical pharmacists, lack of documentation and communication, lack of time or crowded clinics, and patient resistance/acceptance.                                        |
| Frich (2010) <sup>74</sup>     | 7 | NM        | Norway                        | General practitioners and tutors                                  | 39+<br>20       | Nine focus group interviews  | Explanations for inappropriate prescriptions were with lack of knowledge, factors associated with patients, the GP's background, the practice, and other health professionals or health care facilities.                                                                                                            |

### Abbreviation

CIR-G: number of cumulative illness rating scale for geriatric patients; CCI, Charlson comorbidity index;

NM: Not mentioned
