# Supplementary material for: Factors associated with potentially inappropriate prescriptions and barriers to medicines optimisation among older adults in primary care settings: a systematic review
Source: HighWire-hosted journal article supplement (doi:10.1136/fmch-2021-001325), 2021-11-01
Supplement: fmch-2021-001325supp004_data_supplement.pdf [file fmch-2021-001325supp004_data_supplement.pdf]

Table S4 Quality appraisal results

| Joanna Briggs Institute (JBI) scores for qualitative studies |           |                              |                                                                                               |                                                                                              |                                                                                           |                                                                                                  |                                                                                        |                                                                           |                                                                                |                                                             |                                                                                                                                                 |                                                                                                         |
|--------------------------------------------------------------|-----------|------------------------------|-----------------------------------------------------------------------------------------------|----------------------------------------------------------------------------------------------|-------------------------------------------------------------------------------------------|--------------------------------------------------------------------------------------------------|----------------------------------------------------------------------------------------|---------------------------------------------------------------------------|--------------------------------------------------------------------------------|-------------------------------------------------------------|-------------------------------------------------------------------------------------------------------------------------------------------------|---------------------------------------------------------------------------------------------------------|
| Study                                                        | JBI score | Results of quality appraisal | Is there congruity between the stated philosophical perspective and the research methodology? | Is there congruity between the research methodology and the research question or objectives? | Is there congruity between the research methodology and the methods used to collect data? | Is there congruity between the research methodology and the representation and analysis of data? | Is there congruity between the research methodology and the interpretation of results? | Is there a statement locating the researcher culturally or theoretically? | Is the influence of the researcher on the research, and vice-versa, addressed? | Are participants, and their voices, adequately represented? | Is the research ethical according to current criteria or, for recent studies, and is there evidence of ethical approval by an appropriate body? | Do the conclusions drawn in the research report flow from the analysis, or interpretation, of the data? |
| Rieckert (2018)                                              | 9         | High quality                 | Unclear                                                                                       | Yes                                                                                          | Yes                                                                                       | Yes                                                                                              | Yes                                                                                    | Yes                                                                       | Yes                                                                            | Yes                                                         | Yes                                                                                                                                             | Yes                                                                                                     |
| Clyne (2016)                                                 | 8         | High quality                 | Unclear                                                                                       | Yes                                                                                          | Yes                                                                                       | Yes                                                                                              | Yes                                                                                    | Yes                                                                       | Unclear                                                                        | Yes                                                         | Yes                                                                                                                                             | Yes                                                                                                     |
| Heser (2018)                                                 | 8         | High quality                 | Unclear                                                                                       | Yes                                                                                          | Yes                                                                                       | Yes                                                                                              | Yes                                                                                    | Yes                                                                       | Unclear                                                                        | Yes                                                         | Yes                                                                                                                                             | Yes                                                                                                     |
| Straßner (2017)                                              | 8         | High quality                 | Unclear                                                                                       | Yes                                                                                          | Yes                                                                                       | Yes                                                                                              | Yes                                                                                    | Yes                                                                       | Unclear                                                                        | Yes                                                         | Yes                                                                                                                                             | Yes                                                                                                     |
| Pohontsch (2017)                                             | 8         | High quality                 | Unclear                                                                                       | Yes                                                                                          | Yes                                                                                       | Yes                                                                                              | Yes                                                                                    | Yes                                                                       | Unclear                                                                        | Yes                                                         | Yes                                                                                                                                             | Yes                                                                                                     |
| Heyworth (2013)                                              | 8         | High quality                 | Unclear                                                                                       | Yes                                                                                          | Yes                                                                                       | Yes                                                                                              | Yes                                                                                    | Yes                                                                       | Unclear                                                                        | Yes                                                         | Yes                                                                                                                                             | Yes                                                                                                     |
| Anderson (2017)                                              | 7         | Low quality                  | Unclear                                                                                       | Yes                                                                                          | Yes                                                                                       | Yes                                                                                              | Yes                                                                                    | Unclear                                                                   | Unclear                                                                        | Yes                                                         | Yes                                                                                                                                             | Yes                                                                                                     |
| Schuling                                                     | 7         | Low                          | Unclear                                                                                       | Yes                                                                                          | Yes                                                                                       | Yes                                                                                              | Yes                                                                                    | Unclear                                                                   | Unclear                                                                        | Yes                                                         | Yes                                                                                                                                             | Yes                                                                                                     |

|                  |   |             |         |     |     |     |     |         |         |     |     |     |
|------------------|---|-------------|---------|-----|-----|-----|-----|---------|---------|-----|-----|-----|
| (2012)           |   | quality     |         |     |     |     |     |         |         |     |     |     |
| Hansen (2018)    | 7 | Low quality | Unclear | Yes | Yes | Yes | Yes | Unclear | Unclear | Yes | Yes | Yes |
| Wallis (2017)    | 7 | Low quality | Unclear | Yes | Yes | Yes | Yes | Unclear | Unclear | Yes | Yes | Yes |
| Weir (2019)      | 7 | Low quality | Unclear | Yes | Yes | Yes | Yes | No      | Unclear | Yes | Yes | Yes |
| Magin (2015)     | 7 | Low quality | Unclear | Yes | Yes | Yes | Yes | No      | Unclear | Yes | Yes | Yes |
| AlRasheed (2018) | 7 | Low quality | Unclear | Yes | Yes | Yes | Yes | No      | Unclear | Yes | Yes | Yes |
| Frich (2010)     | 7 | Low quality | Unclear | Yes | Yes | Yes | Yes | Unclear | Unclear | Yes | Yes | Yes |

| Joanna Briggs Institute (JBI) scores for cross sectional studies |           |                              |                                                                |                                                              |                                                        |                                                                          |                                      |                                                          |                                                         |                                            |
|------------------------------------------------------------------|-----------|------------------------------|----------------------------------------------------------------|--------------------------------------------------------------|--------------------------------------------------------|--------------------------------------------------------------------------|--------------------------------------|----------------------------------------------------------|---------------------------------------------------------|--------------------------------------------|
| Study                                                            | JBI score | Results of quality appraisal | Were the criteria for inclusion in the sample clearly defined? | Were the study subjects and the setting described in detail? | Was the exposure measured in a valid and reliable way? | Were objective, standard criteria used for measurement of the condition? | Were confounding factors identified? | Were strategies to deal with confounding factors stated? | Were the outcomes measured in a valid and reliable way? | Was appropriate statistical analysis used? |
| Bradley (2012)                                                   | 7         | High quality                 | Yes                                                            | Yes                                                          | Yes                                                    | Yes                                                                      | Yes                                  | Yes                                                      | Unclear                                                 | Yes                                        |
| Vatcharavongvan (2019)                                           | 8         | High quality                 | Yes                                                            | Yes                                                          | Yes                                                    | Yes                                                                      | Yes                                  | Yes                                                      | Yes                                                     | Yes                                        |
| Fialová (2005)                                                   | 7         | High quality                 | Unclear                                                        | Yes                                                          | Yes                                                    | Yes                                                                      | Yes                                  | Yes                                                      | Yes                                                     | Yes                                        |
| Castillo-Páramo (2014)                                           | 7         | High quality                 | Yes                                                            | Yes                                                          | Yes                                                    | Yes                                                                      | Yes                                  | Yes                                                      | Unclear                                                 | Yes                                        |
| Nuñez-Montenegro (2019)                                          | 7         | High quality                 | Yes                                                            | Yes                                                          | Yes                                                    | Yes                                                                      | Yes                                  | No                                                       | Yes                                                     | Yes                                        |
| Wang (2019)                                                      | 6         | High quality                 | Unclear                                                        | Yes                                                          | Yes                                                    | Yes                                                                      | Yes                                  | Yes                                                      | Unclear                                                 | Yes                                        |
| Ble (2015)                                                       | 7         | High quality                 | Yes                                                            | Yes                                                          | Yes                                                    | Unclear                                                                  | Yes                                  | Yes                                                      | Yes                                                     | Yes                                        |

|                        |   |              |         |     |     |                |     |     |         |     |
|------------------------|---|--------------|---------|-----|-----|----------------|-----|-----|---------|-----|
| Moriarty (2015)        | 6 | High quality | Yes     | Yes | Yes | Unclear        | Yes | Yes | Unclear | Yes |
| Lopez-Rodriguez (2020) | 7 | High quality | Yes     | Yes | Yes | Yes            | Yes | No  | Yes     | Yes |
| Cahir (2014)           | 6 | High quality | Unclear | Yes | Yes | Unclear        | Yes | Yes | Yes     | Yes |
| Bradley (2014)         | 6 | High quality | Unclear | Yes | Yes | Yes            | Yes | Yes | Unclear | Yes |
| Lund (2012)            | 6 | High quality | Yes     | Yes | Yes | Not applicable | Yes | Yes | Unclear | Yes |
| Buck (2009)            | 7 | High quality | Yes     | Yes | Yes | Not applicable | Yes | Yes | Yes     | Yes |
| Cahir (2010)           | 6 | High quality | Unclear | Yes | Yes | Not applicable | Yes | Yes | Yes     | Yes |
| Kovačević (2014)       | 4 | Low quality  | Yes     | Yes | Yes | No             | No  | No  | Unclear | Yes |
| Lin (2011)             | 5 | Low quality  | Unclear | Yes | Yes | Yes            | Yes | No  | Unclear | Yes |
| Simões (2019)          | 6 | Low quality  | No      | Yes | Yes | Yes            | Yes | Yes | Unclear | Yes |
| Howard (2004)          | 5 | Low quality  | Unclear | Yes | Yes | No             | Yes | Yes | Unclear | Yes |
| Zeenny (2017)          | 5 | Low quality  | Unclear | Yes | Yes | No             | Yes | Yes | Unclear | Yes |

|                      |   |             |         |     |     |         |     |     |         |     |
|----------------------|---|-------------|---------|-----|-----|---------|-----|-----|---------|-----|
| Awad (2019)          | 5 | Low quality | Unclear | Yes | Yes | No      | Yes | No  | Yes     | Yes |
| Gorup (2017)         | 5 | Low quality | Yes     | Yes | Yes | No      | No  | No  | Unclear | Yes |
| Mand (2014)          | 6 | Low quality | Unclear | Yes | Yes | Yes     | Yes | No  | Yes     | Yes |
| Tommelein (2016)     | 5 | Low quality | Unclear | Yes | Yes | Yes     | No  | No  | Yes     | Yes |
| Sakr (2018)          | 4 | Low quality | Unclear | Yes | Yes | Unclear | Yes | No  | Unclear | Yes |
| Hamano               | 5 | Low quality | Unclear | Yes | Yes | Unclear | Yes | Yes | Unclear | Yes |
| Zhang (2020)         | 5 | Low quality | Yes     | Yes | Yes | No      | Yes | No  | Unclear | Yes |
| Liu (2020)           | 5 | Low quality | Unclear | Yes | Yes | Yes     | Yes | No  | Unclear | Yes |
| Rogero-Blanco (2020) | 5 | Low quality | Yes     | Yes | Yes | Unclear | Yes | No  | Unclear | Yes |
| Bala (2019)          | 5 | Low quality | Unclear | Yes | Yes | No      | Yes | Yes | Unclear | Yes |
| Alhmoud (2015)       | 6 | Low quality | Yes     | Yes | Yes | No      | Yes | Yes | Unclear | Yes |
| Sayin (2020)         | 4 | Low quality | Unclear | Yes | Yes | No      | Yes | No  | Unclear | Yes |

|               |   |              |         |     |     |                |     |     |         |     |
|---------------|---|--------------|---------|-----|-----|----------------|-----|-----|---------|-----|
| Imai (2007)   | 6 | High quality | Yes     | Yes | Yes | Not applicable | Yes | Yes | Unclear | Yes |
| Brekke (2008) | 4 | Low quality  | Unclear | Yes | Yes | Unclear        | Yes | No  | Unclear | Yes |
| Ile (2017)    | 5 | Low quality  | Unclear | Yes | Yes | No             | Yes | Yes | Unclear | Yes |

| Joanna Briggs Institute (JBI) scores for cohort studies |           |                              |                                                                     |                                                                                              |                                                        |                                      |                                                          |                                                                                                            |                                                         |                                                                                         |                                                                                                   |                                                           |                                            |
|---------------------------------------------------------|-----------|------------------------------|---------------------------------------------------------------------|----------------------------------------------------------------------------------------------|--------------------------------------------------------|--------------------------------------|----------------------------------------------------------|------------------------------------------------------------------------------------------------------------|---------------------------------------------------------|-----------------------------------------------------------------------------------------|---------------------------------------------------------------------------------------------------|-----------------------------------------------------------|--------------------------------------------|
| Study                                                   | JBI score | Results of quality appraisal | Were the two groups similar and recruited from the same population? | Were the exposures measured similarly to assign people to both exposed and unexposed groups? | Was the exposure measured in a valid and reliable way? | Were confounding factors identified? | Were strategies to deal with confounding factors stated? | Were the groups/participants free of the outcome at the start of the study (or at the moment of exposure)? | Were the outcomes measured in a valid and reliable way? | Was the follow up time reported and sufficient to be long enough for outcomes to occur? | Was follow up complete, and if not, were the reasons to loss to follow up described and explored? | Were strategies to address incomplete follow up utilized? | Was appropriate statistical analysis used? |
| Pugh (2011)                                             | 6         | High quality                 | Yes                                                                 | Yes                                                                                          | Yes                                                    | Yes                                  | No                                                       | Not applicable                                                                                             | Yes                                                     | Not applicable                                                                          | Not applicable                                                                                    | Not applicable                                            | Yes                                        |
| Amos (2015)                                             | 7         | High quality                 | Yes                                                                 | Yes                                                                                          | Yes                                                    | Yes                                  | Yes                                                      | Not applicable                                                                                             | Yes                                                     | Not applicable                                                                          | Not applicable                                                                                    | Not applicable                                            | Yes                                        |
